# Supplementary material for: The homeobox transcription factor HB9 induces senescence and blocks differentiation in hematopoietic stem and progenitor cells
Source: PubMed Central journal article supplement — Haematologica. 2018 Aug 9;104(1):35–46. doi: 10.3324/haematol.2018.189407 (PMC6312034; doi:10.3324/haematol.2018.189407), 2019-01
Supplement: 2018_189407-Disclosures_and_Contributions.pdf [file 2018_189407-Disclosures_and_Contributions.pdf]

Haematologica  
HAEMATOL/2018/189407  
Version 4

The homeobox transcription factor HB9 induces senescence and blocks differentiation in hematopoietic stem and progenitor cells

Deborah Ingenhag, Sven Reister, Franziska Auer, Sanil Bhatia, Sarah Wildenhain, Daniel Picard, Marc Remke, Jessica I. Hoell, Andreas Kloetgen, Dennis Sohn, Reiner U. Jänicke, Gesine Koegler, Arndt Borkhardt, and Julia Hauer

Disclosures: The authors declare no potential conflicts of interest. Financial support: JH has been supported by the German Children's Cancer Foundation (110997), the German José Carreras Leukemia Foundation (DJCLS 02R/2016), the Deutsche Kinderkrebsstiftung (DKS 2016.17) and the "Forschungskommission" of the medical faculty of Heinrich-Heine-University.

Contributions: Study conception and design: JH, DI, AB Material support: MR, JIH, RUJ, GK Acquisition of data: DI, FA, SB Analysis and interpretation of data: DI, JH, SR, DP, DS, AK, SB Drafting of manuscript: JH, DI, SR, AB Critical revision: JH, DI, SR, SB, FA, DP, SW, MR, JIH, AK, DS, RUJ, GK, AB
